# Supplementary material for: Thickness-controllable coating of SiO2 on Co microspheres with tunable electromagnetic properties and enhanced oxidation resistance
Source: Royal Society of Chemistry journal article supplement (doi:10.1039/c6ra24519f), 2016-01-01
Supplement: c6ra24519f1.pdf [file c6ra24519f1.pdf]

Electronic Supplementary Information (ESI) for

**Thickness-controllable coating of SiO<sub>2</sub> on Co microspheres with  
tunable electromagnetic properties and enhanced oxidation  
resistance**

Na Chen<sup>1</sup>, Jiang-Tang Jiang<sup>1,\*</sup>, Cheng-Yan Xu<sup>1,2</sup>, YongYuan<sup>3</sup>, Liang Zhen<sup>1,2,\*</sup>

<sup>1</sup> School of Materials Science and Engineering, Harbin Institute of Technology, Harbin, 150001,

China

<sup>2</sup> MOE Key Laboratory of Micro-system and Micro-structures Manufacturing, Harbin Institute of

Technology, Harbin 150080, China

<sup>3</sup> Precision Machinery Research Institutes of Shanghai Space Flight Academy, Shanghai 201600,

China

\*Corresponding authors, Tel: 86-451-8641-2133; Fax: 86-451-8641-3921; E-mail:  
jjtcy@hit.edu.cn; lzhen@hit.edu.cn.

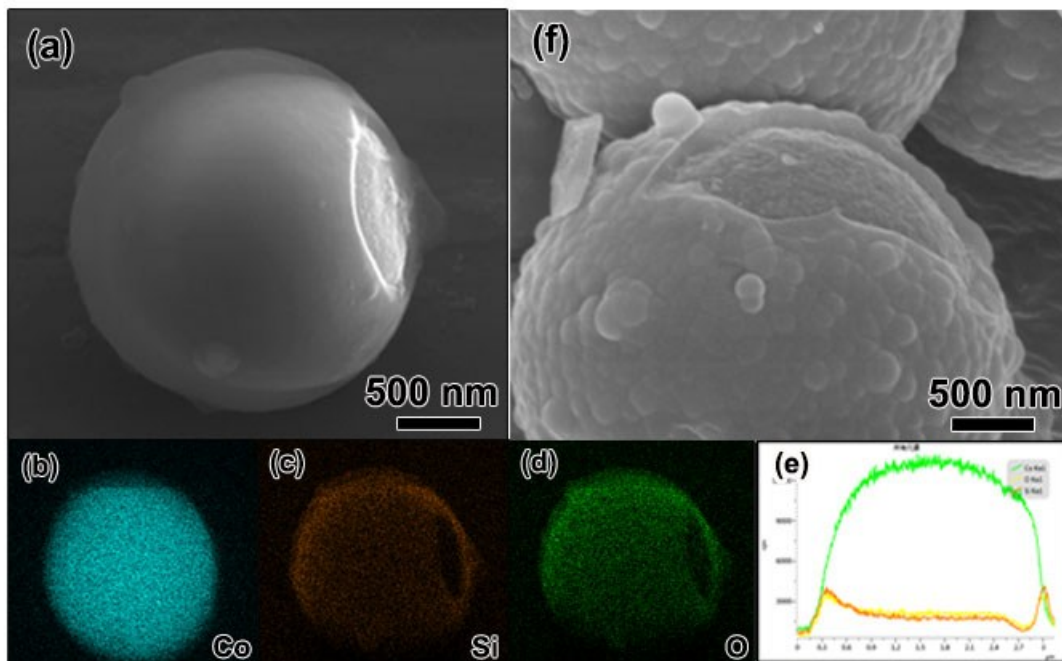

**Fig. S1** (a) SEM images, (b-d) elemental maps of Co, Si and O, and (e) line scanning of a single broken Co@SiO<sub>2</sub> composite microsphere coated for three times. (f) SEM image of Co@SiO<sub>2</sub> composite microspheres coated for five times.
